# Supplementary material
Source: PubMed Central journal article supplement (PMC3346379)

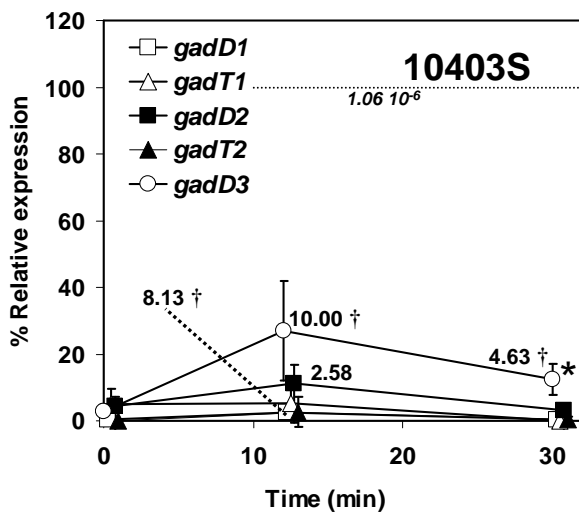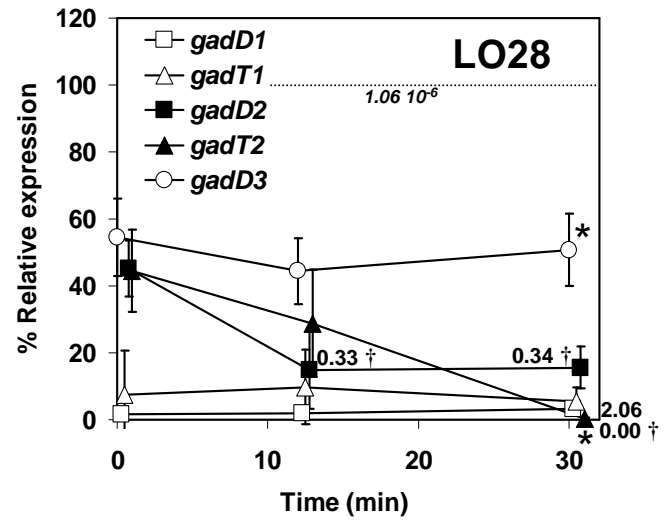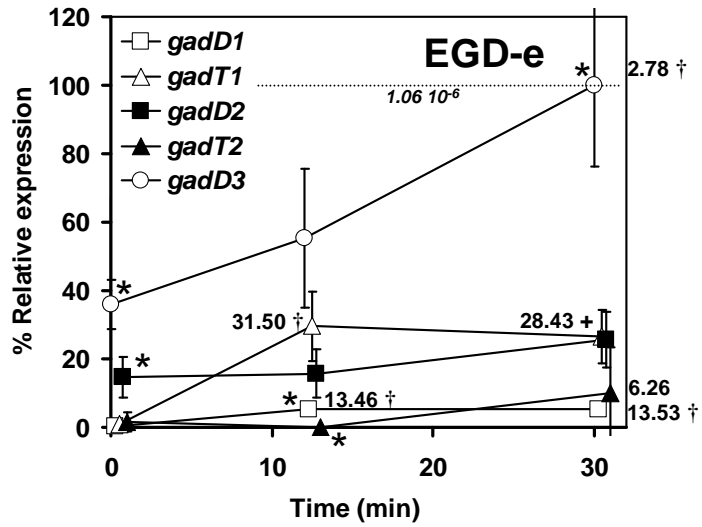

Supplemental material  
Fig. 1

Supplement: supp_78.10.3571_AEM00227-12_FigS1.pdf [file supp_78.10.3571_AEM00227-12_FigS1.pdf]
